# Supplementary material for: Functional role of formate dehydrogenase 1 (FDH1) for host and nonhost disease resistance against bacterial pathogens
Source: PLoS One. 2022 May 20;17(5):e0264917. doi: 10.1371/journal.pone.0264917 (PMC9122214; doi:10.1371/journal.pone.0264917)
Supplement: S1 Data — (XLSX) [file pone.0264917.s009.xlsx]

## Sheet: Tomato T1
Bacterial growth
Exp1.	Day 0	Day 1	Day 2	Day 3	STD-Day 0	Day 1	Day 2	Day 3
WT	3.6735	5.80318	6.07091	5.76261	0.0468593	0.0192192	0.120256	0.196724
TRV2::GFP	3.55024	5.27447	5.58321	6.08709	0.105877	0.17851	0.0510057	0.148592
TRV2::24 E7	3.60689	5.17846	5.57902	4.88317	0.292737	0.11713	0.103083	0.249974
Exp2.	Day 0	Day 1	Day 2	Day 3	STD-Day 0	Day 1	Day 2	Day 3
WT	2.73413	4.40974	5.01515	5.23413	0.216917	0.362912	0.324404	0.445113
TRV2::GFP	3.39694	4.40788	5.00109	5.13968	0.400816	0.318541	0.359845	0.366882
TRV2::24 E7	3.12381	4.85699	5.13464	6.06819	0.729212	0.148727	0.252339	0.401364

## Sheet: Tabaci
		WT	TRV2::GFP	TRV2::24 E7
Exp1
		3.07918	3.77085	3.38021
		3.07918	3.91381	3.6902
		2	3.20412	2.30103
		2.77815	2.69897
	Average	2.73413	3.39694	3.12381
	standard deviation	0.509577	0.557169	0.729212
Exp2		WT	TRV2::GFP	TRV2::24 E7
		4.38021	4.14613	4.74036
		4.38021	4.11394	4.91381
		4.43136	4.32222	4.73239
		4.44716	5.04922	5.04139
	Average	4.40974	4.40788	4.85699
	standard deviation	0.0346967	0.437251	0.148727
Exp3		WT	TRV2::GFP	TRV2::24 E7
		5.11727	5.00432	5.50515
		5.02531	5.06446	5.07918
		4.95424	4.9345	4.95424
		4.96379		5
	Average	5.01515	5.00109	5.13464
	standard deviation	0.0750104	0.0650399	0.252339
Exp4		WT	TRV2::GFP	TRV2::24 E7
		6.03342	6.25768	6.06819
		5.50515	4.69897	5.38021
		5.43136	4.90309	6.01703
		5.43136	4.69897	5.25527
	Average	5.60033	5.13968	5.68018
	standard deviation	0.29082	0.75152	0.422116
